# Supplementary material for: Emergence of a Latent Indian Cassava Mosaic Virus from Cassava Which Recovered from Infection by a Non-Persistent Sri Lankan Cassava Mosaic Virus
Source: Viruses. 2016 Sep 28;8(10):264. doi: 10.3390/v8100264 (PMC5086600; doi:10.3390/v8100264)
Supplement: Supplementary file 1 [file viruses-08-00264-s001.pdf]

# Supplementary Materials: Emergence of a Latent Indian Cassava Mosaic Virus from Cassava Which Recovered from Infection by a Non-Persistent Sri Lankan Cassava Mosaic Virus

Chockalingam Karthikeyan, Basavaprabhu L. Patil, Basanta K. Borah, Thulasi R. Resmi, Silvia Turco, Mikhail M. Pooggin, Thomas Hohn and Karuppannan Veluthambi

a

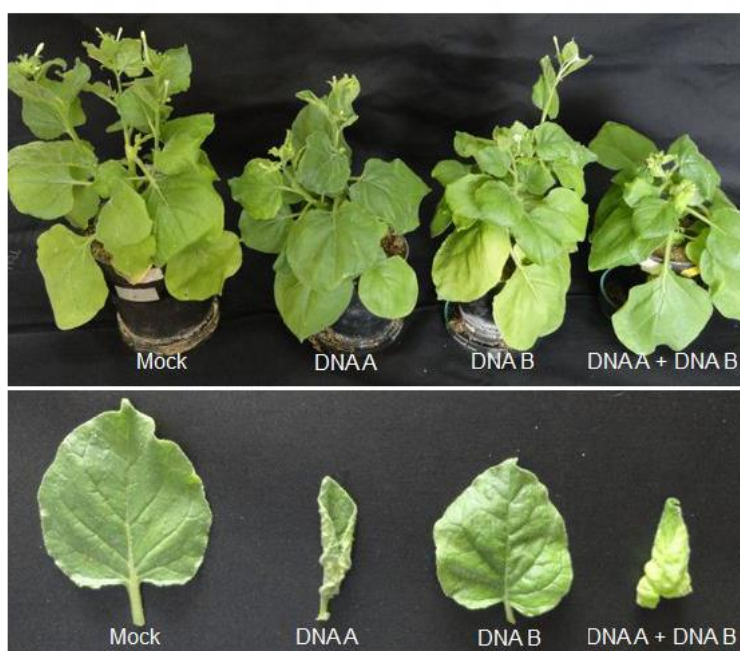

b

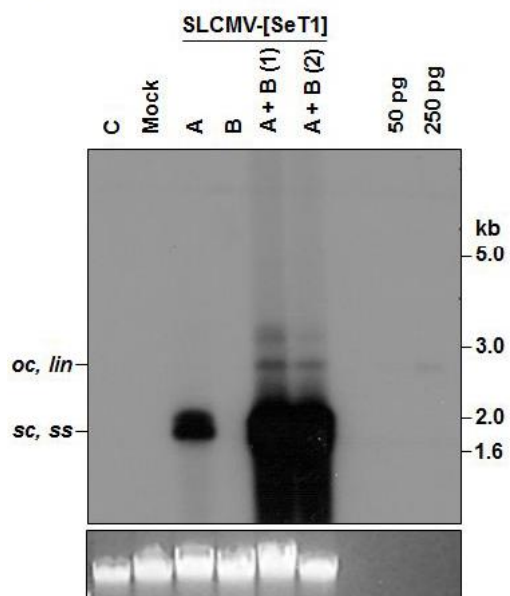

c

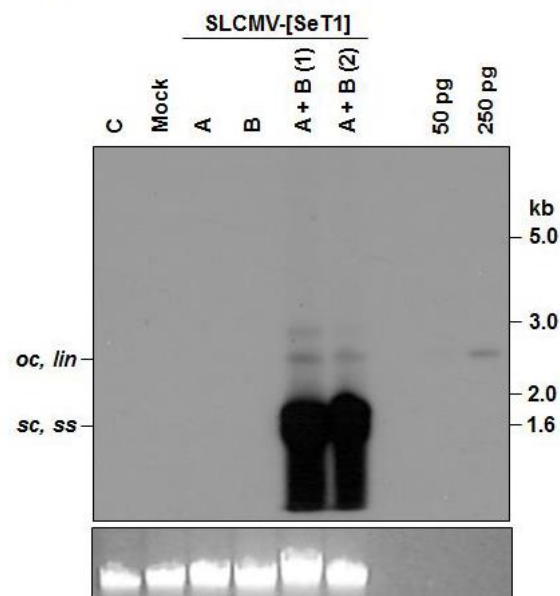

**Figure S1.** Infectivity analysis of Sri Lankan cassava mosaic virus (SLCMV)-[SeT1] partial dimers in *Nicotiana benthamiana* plants. (a) Symptoms displayed by *N. benthamiana* plants agroinoculated with the partial dimers of SLCMV-[SeT1]. Bottom half shows individual leaves of the tested plants. (b) Southern blot analysis using SLCMV-[SeT1] DNA-A (without common region [ΔCR]) labelled with

[ $\alpha$ -32P]dCTP as the probe. The plasmid pBS-SLCMV-Tv-A digested with PstI (50 pg and 250 pg) was used as the positive control. (c) Southern blot analysis using [ $\alpha$ -32P]dCTP-labelled SLCMV-[SeT1] DNA-B ( $\Delta$ CR) as the probe. The plasmid pBS-SLCMV-Ma-B digested with BamHI (50 pg and 250 pg) was used as the positive control. In (b) and (c), DNA (1  $\mu$ g) from uninfected plant (C), plant mock infected with the *Agrobacterium tumefaciens* strain Ach5 (Ach5), plant agroinoculated with the partial dimers of DNA-A alone (A), DNA-B alone (B) and plants co-agroinoculated with the partial dimers of DNA-A + DNA-B (A + B) (in duplicates) were loaded in the respective lanes. Positions of different forms of viral DNA-single stranded (*ss*), super-coiled (*sc*), open circular (*oc*) and linear (*lin*) are marked. Ethidium bromide stained high molecular weight plant DNA is shown for loading control at the bottom.
